# Supplementary material for: Evidence of Low Adherence to Stimulant Medication Among Children and Youths With ADHD: An Electronic Health Records Study
Source: Atypon-hosted journal article supplement (doi:10.1176/appi.ps.201800515), 2019-06-27
Supplement: appi.ps.201800515.ds001.pdf [file appi.ps.201800515.ds001.pdf]

**Online Supplement****Sociodemographic and clinical correlates of stimulant medication adherence in the discovery set (N=1,662).**

Bivariate analyses comparing rates of stimulant medication adherence between patients with different demographic and treatment characteristics. There were small but statistically significant differences in the rates of stimulant medication adherence when examining age, sex, race, medication formulation, and prescribing clinic.

| Characteristic                   | Non-adherent to Treatment<br>N=900 |       | Adherent to Treatment<br>N=762 |       | P-Value |
|----------------------------------|------------------------------------|-------|--------------------------------|-------|---------|
|                                  | N                                  | Row % | N                              | Row % |         |
| Age (Mean ± SD)                  | 12.5±3.0                           |       | 12.1±3.0                       |       | .005    |
| Age Group                        |                                    |       |                                |       | .07     |
| Child (age <12) (N=673)          | 346                                | 51    | 327                            | 49    |         |
| Adolescent (age ≥12) (N=989)     | 554                                | 56    | 435                            | 44    |         |
| Sex                              |                                    |       |                                |       | .02     |
| Male (N=1,217)                   | 638                                | 52    | 579                            | 48    |         |
| Female (N=445)                   | 262                                | 59    | 183                            | 41    |         |
| Racial-ethnic Group <sup>†</sup> |                                    |       |                                |       | .002    |
| Caucasian (N=1,189)              | 673                                | 57    | 516                            | 43    |         |
| Not Caucasian (N=473)            | 227                                | 48    | 246                            | 52    |         |
| Primary Language                 |                                    |       |                                |       | .33     |
| English (N=1,522)                | 830                                | 55    | 692                            | 45    |         |
| Not English (N=140)              | 70                                 | 50    | 70                             | 50    |         |
| Economic Class                   |                                    |       |                                |       | .22     |
| Lower (N=562)                    | 288                                | 51    | 274                            | 49    |         |
| Middle (N=548)                   | 308                                | 56    | 240                            | 44    |         |
| Upper (N=552)                    | 304                                | 55    | 248                            | 45    |         |
| Medication Formulation           |                                    |       |                                |       | .97     |
| Long-acting (N=1,214)            | 657                                | 54    | 557                            | 46    |         |
| Short-acting (N=448)             | 243                                | 54    | 205                            | 46    |         |
| Medication Type                  |                                    |       |                                |       | .002    |
| Methylphenidate (N=1,193)        | 617                                | 52    | 576                            | 48    |         |
| Amphetamine (N=469)              | 283                                | 60    | 186                            | 40    |         |
| Prescription Source              |                                    |       |                                |       | .001    |
| Psychiatric Clinic (N=694)       | 335                                | 48    | 359                            | 52    |         |
| Non-psychiatric Clinic (N=968)   | 565                                | 58    | 403                            | 42    |         |

SD=standard deviation; <sup>†</sup> Racialethnic group combined into Caucasian versus non-Caucasian for analysis. Breakdown in discovery set is as follows: Caucasian: N=1147 (69.0%); Black: N=101 (6.1%); Asian: N=36 (2.2%); Hispanic: N=263 (15.8%); Native American: N=5 (0.3%); Other: N=51 (3.1%); Not Reported: N=59 (3.5%)

**Predictors of stimulant medication adherence in the discovery set (N=1,662.)** Multivariable logistic regression predicting stimulant medication adherence from demographic characteristics with p-values  $\leq .10$  in the bivariate analyses and all treatment characteristics. The characteristics that remained significantly associated with stimulant medication adherence after controlling for all other variables were *age, race, medication type, and clinic source*. However, overall, this model yielded an AUC statistic of .59 indicating that these demographic and treatment characteristics were only modestly better than chance.

| Variable                                                               | Adherent to Treatment versus<br>Non-adherent to Treatment |             |         |
|------------------------------------------------------------------------|-----------------------------------------------------------|-------------|---------|
|                                                                        | OR                                                        | 95% CI      | P-Value |
| Age                                                                    | .97                                                       | .93 – .99   | .047    |
| Male (reference: female)                                               | 1.24                                                      | .99 – 1.55  | .06     |
| Caucasian (reference: non-Caucasian)                                   | .69                                                       | .55 – .86   | .001    |
| Long-acting Formulation (reference: short-acting formulation)          | 1.04                                                      | .83 – 1.31  | .72     |
| Methylphenidate (reference: amphetamine)                               | 1.34                                                      | 1.07 – 1.67 | .01     |
| Prescription from Psychiatry Clinic (reference: non-psychiatry clinic) | 1.58                                                      | 1.23 – 2.02 | <.001   |

OR=odds ratio; CI=confidence interval

**Sociodemographic and clinical correlates of stimulant medication adherence in the replication set (N=544).**

Bivariate analyses comparing rates of stimulant medication adherence between patients with different demographic and treatment characteristics. There were small but statistically significant differences in medication formulation and economic status. Applying the same multivariable logistic regression model from the discovery set to predict stimulant medication adherence in the replication set, we got an AUC statistic of .58, indicating an absence of overfitting in the initial model and suggesting again that demographic and treatment characteristics alone were poor predictors of stimulant medication adherence.

| Characteristic                | Non-adherent to Treatment<br>N=283 |       | Adherent to Treatment<br>N=261 |       | P-Value |
|-------------------------------|------------------------------------|-------|--------------------------------|-------|---------|
|                               | N                                  | Row % | N                              | Row % |         |
| Age (Mean ± SD)               | 12.5±3.0                           |       | 12.2±3.0                       |       | .24     |
| Age                           |                                    |       |                                |       | .34     |
| Child (age <12) (N=224)       | 111                                | 50    | 113                            | 50    |         |
| Adolescent (age ≥12) (N=320)  | 172                                | 54    | 148                            | 46    |         |
| Sex                           |                                    |       |                                |       | .26     |
| Male (N=407)                  | 206                                | 51    | 201                            | 49    |         |
| Female (N=137)                | 77                                 | 56    | 60                             | 44    |         |
| Race <sup>†</sup>             |                                    |       |                                |       | .86     |
| Caucasian (N=379)             | 196                                | 52    | 183                            | 48    |         |
| Not Caucasian (N=165)         | 87                                 | 53    | 78                             | 47    |         |
| Primary Language              |                                    |       |                                |       | .71     |
| English (N=493)               | 255                                | 52    | 238                            | 48    |         |
| Not English (N=51)            | 28                                 | 55    | 23                             | 45    |         |
| Economic Status               |                                    |       |                                |       | .01     |
| Lower (N=177)                 | 79                                 | 45    | 98                             | 55    |         |
| Middle (N=182)                | 93                                 | 51    | 89                             | 49    |         |
| Upper (N=185)                 | 111                                | 60    | 74                             | 40    |         |
| Medication Formulation        |                                    |       |                                |       | .04     |
| Long-acting (N=425)           | 211                                | 52    | 214                            | 48    |         |
| Short-acting (N=119)          | 72                                 | 60    | 47                             | 40    |         |
| Medication Type               |                                    |       |                                |       | .42     |
| Methylphenidate (N=380)       | 202                                | 52    | 178                            | 47    |         |
| Amphetamine (N=164)           | 81                                 | 49    | 83                             | 51    |         |
| Prescription Source           |                                    |       |                                |       | .28     |
| Psychiatry Clinic (N=232)     | 114                                | 49    | 118                            | 51    |         |
| Non-psychiatry Clinic (N=312) | 169                                | 54    | 143                            | 46    |         |

SD=standard deviation; <sup>†</sup>Race combined into Caucasian versus non-Caucasian for analysis. Breakdown in discovery set is as follows: Caucasian: N=364 (66.9%); Black: N=37 (6.8%); Asian: N=14 (2.6%); Hispanic: N=89 (16.4%); Native American: N=0 (0%); Other: N=18 (3.3%); Not Reported: N=22 (4.0%)
